# Supplementary material for: Multiorgan Failure With Emphasis on Acute Kidney Injury and Severity of COVID-19: Systematic Review and Meta-Analysis
Source: PubMed Central journal article supplement — Can J Kidney Health Dis. 2020 Jul 7;7:2054358120938573. doi: 10.1177/2054358120938573 (PMC7343353; doi:10.1177/2054358120938573), 2020-07-07
Supplement: Supplementary_Table.pdf [file Supplementary_Table.pdf]

**Table S1. Search strategy**

| <b>Search Engine</b> | <b>Keywords</b>                                                                                                                                                                                                                                                                                                                                                                                         | <b>Records</b> |
|----------------------|---------------------------------------------------------------------------------------------------------------------------------------------------------------------------------------------------------------------------------------------------------------------------------------------------------------------------------------------------------------------------------------------------------|----------------|
| PubMed               | ("COVID-19"[All Fields] OR "SARS-CoV-2"[All Fields] AND "Characteristics"[All Fields]) OR ("COVID-19"[All Fields] OR "SARS-CoV-2"[All Fields] AND ("Acute kidney injury"[All Fields] OR "Renal dysfunction"[All Fields])) OR ("COVID-19"[All Fields] OR "SARS-CoV-2"[All Fields] AND "liver injury"[All Fields]) OR ("COVID-19"[All Fields] OR "SARS-CoV-2"[All Fields] AND "coagulopathy"[All Fields]) | 345            |
| SCOPUS               | ("COVID-19" OR "SARS-CoV-2" AND "Characteristics") OR ("COVID-19" OR "SARS-CoV-2" AND ("Acute kidney injury" OR "Renal dysfunction")) OR ("COVID-19" OR "SARS-CoV-2" AND "liver injury") OR ("COVID-19" OR "SARS-CoV-2" AND "coagulopathy")                                                                                                                                                             | 123            |
| EuropePMC            | ("COVID-19" OR "SARS-CoV-2" AND "Characteristics") OR ("COVID-19" OR "SARS-CoV-2" AND ("Acute kidney injury" OR "Renal dysfunction")) OR ("COVID-19" OR "SARS-CoV-2" AND "liver injury") OR ("COVID-19" OR "SARS-CoV-2" AND "coagulopathy")                                                                                                                                                             | 633            |
| Cochrane CENTRAL     | ("COVID-19" OR "SARS-CoV-2" AND "Characteristics") OR ("COVID-19" OR "SARS-CoV-2" AND ("Acute kidney injury" OR "Renal dysfunction")) OR ("COVID-19" OR "SARS-CoV-2" AND "liver injury") OR ("COVID-19" OR "SARS-CoV-2" AND "coagulopathy")<br>(Title/Abstract/Keyword)                                                                                                                                 | 8              |

**Table S2. Newcastle–Ottawa scale for assessment of quality of included cohort studies.**

| Study                       | Selection                                                       |                                                 |                                  |                                                                          | Comparability                       |                                     | Outcome               |                                                 |                                                                                                 | Total quality score |
|-----------------------------|-----------------------------------------------------------------|-------------------------------------------------|----------------------------------|--------------------------------------------------------------------------|-------------------------------------|-------------------------------------|-----------------------|-------------------------------------------------|-------------------------------------------------------------------------------------------------|---------------------|
| Quality assessment criteria | Representativeness of exposed cohort                            | Selection of non-exposed cohort                 | Ascertainment of exposure        | Demonstration that outcome of interest was not present at start of study | Study controls for comorbidities    | Study controls for Age and Gender   | Assessment of outcome | Follow-up length                                | Loss to follow-up rate                                                                          |                     |
| Acceptable (★)              | Representative of patients with exposure and confirmed COVID-19 | Drawn from the same community as exposed cohort | Secure records (Medical Records) | <b>Mortality / Severe COVID</b> was not present at on admission          | Yes (Adjusted / Propensity-matched) | Yes (Adjusted / Propensity-matched) | Record linkage        | Defined period of time / during hospitalization | Follow-up completed, or small subjects lost (<20%), or lost subjects unlikely to introduce bias |                     |
| Bai T 2020                  | ★                                                               | ★                                               | ★                                | ★                                                                        | ★                                   | ★                                   | ★                     | ★                                               | ★                                                                                               | 9                   |
| Cao J 2020                  | ★                                                               | ★                                               | ★                                | ★                                                                        | No                                  | No                                  | ★                     | ★                                               | ★                                                                                               | 7                   |

|                  |   |   |   |    |    |    |   |   |   |   |
|------------------|---|---|---|----|----|----|---|---|---|---|
| Chen M 2020      | ★ | ★ | ★ | ★  | ★  | ★  | ★ | ★ | ★ | 9 |
| Chen T 2020      | ★ | ★ | ★ | ★  | No | No | ★ | ★ | ★ | 7 |
| Luo XM 2020      | ★ | ★ | ★ | ★  | No | No | ★ | ★ | ★ | 7 |
| Yang 2020        | ★ | ★ | ★ | ★  | No | No | ★ | ★ | ★ | 7 |
| Zhou 2020        | ★ | ★ | ★ | ★  | ★  | ★  | ★ | ★ | ★ | 9 |
| Guan 2020        | ★ | ★ | ★ | No | No | No | ★ | ★ | ★ | 6 |
| Hu L 2020        | ★ | ★ | ★ | No | ★  | ★  | ★ | ★ | ★ | 8 |
| Li Q 2020        | ★ | ★ | ★ | ?  | No | No | ★ | ★ | ★ | 6 |
| Liu J 2020       | ★ | ★ | ★ | ★  | ★  | ★  | ★ | ★ | ★ | 9 |
| Wan 2020         | ★ | ★ | ★ | ?  | No | No | ★ | ★ | ★ | 6 |
| Zhang Guqin 2020 | ★ | ★ | ★ | No | No | No | ★ | ★ | ★ | 6 |
| Huang 2020       | ★ | ★ | ★ | ★  | No | No | ★ | ★ | ★ | 7 |
| Wang Dawei 2020  | ★ | ★ | ★ | ★  | No | No | ★ | ★ | ★ | 7 |

? = not defined
